# Supplementary material
Source: PubMed Central journal article supplement (PMC8169574)
Supplement: NIHMS1683076-supplement-1.pdf [file NIHMS1683076-supplement-1.pdf]

eSupplement 1. Proxy 0-4 year PedEyeQ domain scores across different eye conditions, showing comparison with visually normal controls

| Eye Condition <sup>a</sup> | N   | Functional vision         |                                           | Bothered by eyes/vision   |                                              | Social                    |                                              |
|----------------------------|-----|---------------------------|-------------------------------------------|---------------------------|----------------------------------------------|---------------------------|----------------------------------------------|
|                            |     | Median (range)<br>P value | Mean difference from<br>controls (95% CI) | Median (range)<br>P value | Mean difference from<br>controls<br>(95% CI) | Median (range)<br>P value | Mean difference from<br>controls<br>(95% CI) |
| Control                    | 89  | 100 (80-100)              |                                           | 100 (95-100)              |                                              | 100 (89-100)              |                                              |
| Amblyopia                  | 36  | 85 (30-100)<br><0.001     | -19 (-26 to -13)                          | 80 (5-100)<br><0.001      | -22 (-30 to -14)                             | 94 (44-100)<br><0.001     | -10 (-15 to -5)                              |
| Cataract                   | 42  | 95 (20-100)<br><0.001     | -14 (-20 to -8)                           | 95 (40-100)<br><0.001     | -12 (-17 to -6)                              | 100 (61-100)<br><0.001    | -3 (-5 to -1)                                |
| Cornea                     | 6   | 90 (50-100)<br><0.001     | -19 (-24 to -14)                          | 82 (30-100)<br><0.001     | -26 (-31 to -20)                             | 100 (83-100)<br>0.34      | -2 (-9 to 5)                                 |
| CVI                        | 21  | 55 (10-100)<br><0.001     | -45 (-56 to -34)                          | 85 (0-100)<br><0.001      | -33 (-50 to -16)                             | 97 (0-100)<br><0.001      | -19 (-36 to -3)                              |
| Eyelid                     | 16  | 95 (65-100)<br><0.001     | -7 (-12 to -2)                            | 95 (70-100)<br><0.001     | -10 (-16 to -4)                              | 100 (72-100)<br><0.001    | -4 (-5 to -2)                                |
| Glaucoma                   | 6   | 100 (65-100)<br><0.001    | -6 (-10 to -3)                            | 97 (50-100)<br><0.001     | -12 (-15 to -8)                              | 97 (83-100)<br>0.002      | -4 (-6 to -2)                                |
| Nystagmus                  | 23  | 80 (35-100)<br><0.001     | -28 (-38 to -18)                          | 95 (45-100)<br><0.001     | -16 (-25 to -7)                              | 100 (83-100)<br><0.001    | -2 (-4 to 0)                                 |
| Orbital                    | 7   | 95 (70-100)<br><0.001     | -8 (-10 to -5)                            | 95 (65-100)<br><0.001     | -13 (-16 to -10)                             | 100 (78-100)<br>0.42      | -3 (-10 to 5)                                |
| Pupil/Iris                 | 7   | 95 (55-100)<br><0.001     | -8 (-12 to -5)                            | 90 (50-100)<br><0.001     | -12 (-16 to -9)                              | 94 (83-100)<br><0.001     | -5 (-7 to -3)                                |
| Refractive error           | 16  | 93 (80-100)<br><0.001     | -8 (-12 to -4)                            | 97 (70-100)<br><0.001     | -7 (-13 to -2)                               | 100 (83-100)<br>0.004     | -2 (-3 to -1)                                |
| Retina                     | 28  | 65 (0-100)<br><0.001      | -40 (-52 to -28)                          | 85 (0-100)<br><0.001      | -25 (-35 to -14)                             | 97 (44-100)<br><0.001     | -11 (-17 to -4)                              |
| Strabismus                 | 137 | 90 (0-100)<br><0.001      | -17 (-20 to -13)                          | 90 (10-100)<br><0.001     | -15 (-19 to -12)                             | 100 (6-100)<br><0.001     | -7 (-9 to -4)                                |

<sup>a</sup>Fewer than 5 children with uveitis completed questionnaires, and therefore were not analyzed.
