# Supplementary material
Source: PubMed Central journal article supplement (PMC8169574)
Supplement: NIHMS1683076-supplement-2.pdf [file NIHMS1683076-supplement-2.pdf]

eSupplement 2. Parent PedEyeQ domain scores for parents of 0- to 4-year-olds with different eye conditions, showing comparison with parents of visually normal controls

| Eye Condition <sup>a</sup> | N   | Impact on Parent and Family |                                        | Worry about Child's Eye Condition |                                        | Worry about Child's Self-Perception and Interactions |                                        | Worry about Child's Functional Vision |                                        |
|----------------------------|-----|-----------------------------|----------------------------------------|-----------------------------------|----------------------------------------|------------------------------------------------------|----------------------------------------|---------------------------------------|----------------------------------------|
|                            |     | Median (range)<br>P value   | Mean difference from controls (95% CI) | Median (range)<br>P value         | Mean difference from controls (95% CI) | Median (range)<br>P value                            | Mean difference from controls (95% CI) | Median (range)<br>P value             | Mean difference from controls (95% CI) |
| Control                    | 89  | 100 (100-100)               |                                        | 100 (45-100)                      |                                        | 100 (57-100)                                         |                                        | 100 (75-100)                          |                                        |
| Amblyopia                  | 36  | 85 (20-100)<br><0.001       | -20 (-26 to -13)                       | 55 (0-95)<br><0.001               | -44 (-53 to -35)                       | 79 (0-100)<br><0.001                                 | -30 (-39 to -20)                       | 66 (0-100)<br><0.001                  | -39 (-49 to -29)                       |
| Cataract                   | 42  | 85 (40-100)<br><0.001       | -18 (-23 to -14)                       | 62 (20-100)<br><0.001             | -38 (-45 to -32)                       | 79 (21-100)<br><0.001                                | -24 (-31 to -16)                       | 75 (6-100)<br><0.001                  | -28 (-34 to -22)                       |
| Cornea                     | 6   | 68 (45-100)<br><0.001       | -30 (-54 to -6)                        | 27 (15-85)<br><0.001              | -59 (-89 to -30)                       | 57 (21-100)<br><0.001                                | -40 (-71 to -9)                        | 47 (19-100)<br><0.001                 | -45 (-85 to -6)                        |
| CVI                        | 21  | 70 (15-100)<br><0.001       | -33 (-43 to -22)                       | 35 (0-100)<br><0.001              | -60 (-74 to -47)                       | 57 (0-100)<br><0.001                                 | -45 (-60 to -30)                       | 31 (0-100)<br><0.001                  | -64 (-77 to -50)                       |
| Eyelid                     | 16  | 85 (40-100)<br><0.001       | -19 (-28 to -10)                       | 43 (10-95)<br><0.001              | -49 (-64 to -35)                       | 54 (0-100)<br><0.001                                 | -46 (-62 to -31)                       | 75 (6-100)<br><0.001                  | -30 (-45 to -15)                       |
| Glaucoma                   | 6   | 80 (50-90)<br><0.001        | -25 (-43 to -7)                        | 45 (15-70)<br><0.001              | -53 (-75 to -32)                       | 68 (14-93)<br><0.001                                 | -35 (-64 to -6)                        | 59 (38-87)<br><0.001                  | -36 (-58 to -14)                       |
| Nystagmus                  | 23  | 90 (40-100)<br><0.001       | -15 (-23 to -7)                        | 60 (0-100)<br><0.001              | -42 (-53 to -30)                       | 79 (43-100)<br><0.001                                | -24 (-33 to -15)                       | 62 (0-100)<br><0.001                  | -42 (-53 to -31)                       |
| Orbital                    | 7   | 80 (75-100)<br><0.001       | -14 (-25 to -2)                        | 85 (20-90)<br><0.001              | -28 (-52 to -5)                        | 71 (21-100)<br><0.001                                | -26 (-33 to -19)                       | 87 (31-100)<br><0.001                 | -18 (-24 to -13)                       |
| Pupil/Iris                 | 7   | 90 (80-100)<br><0.001       | -10 (-18 to -2)                        | 45 (10-80)<br><0.001              | -50 (-73 to -28)                       | 71 (14-100)<br><0.001                                | -34 (-65 to -4)                        | 62 (13-100)<br><0.001                 | -40 (-65 to -14)                       |
| Refractive error           | 16  | 95 (50-100)<br><0.001       | -10 (-17 to -4)                        | 70 (35-95)<br><0.001              | -31 (-40 to -23)                       | 82 (14-100)<br><0.001                                | -23 (-36 to -10)                       | 75 (44-100)<br><0.001                 | -24 (-33 to -15)                       |
| Retina                     | 28  | 70 (20-100)<br><0.001       | -29 (-38 to -21)                       | 55 (5-90)<br><0.001               | -49 (-59 to -38)                       | 57 (0-100)<br><0.001                                 | -39 (-51 to -28)                       | 62 (0-96)<br><0.001                   | -45 (-57 to -33)                       |
| Strabismus                 | 137 | 90 (0-100)<br><0.001        | -16 (-19 to -13)                       | 60 (0-100)<br><0.001              | -41 (-45 to -37)                       | 71 (0-100)<br><0.001                                 | -33 (-37 to -28)                       | 69 (0-100)<br><0.001                  | -35 (-39 to -30)                       |

<sup>a</sup>Fewer than 5 children with uveitis completed questionnaires, and therefore were not analyzed.
