# Supplementary material
Source: PubMed Central journal article supplement (PMC8169574)
Supplement: NIHMS1683076-supplement-3.pdf [file NIHMS1683076-supplement-3.pdf]

eSupplement 3. Child 5–11 year PedEyeQ domain scores across different eye conditions, showing comparison with visually normal controls.

| Eye Condition <sup>a</sup> | N   | Functional Vision         |                                              | Bothered by Eyes/Vision   |                                              | Social                    |                                              | Frustration/Worry         |                                              |
|----------------------------|-----|---------------------------|----------------------------------------------|---------------------------|----------------------------------------------|---------------------------|----------------------------------------------|---------------------------|----------------------------------------------|
|                            |     | Median (range)<br>P value | Mean difference<br>from controls<br>(95% CI) | Median (range)<br>P value | Mean difference<br>from controls<br>(95% CI) | Median (range)<br>P value | Mean difference<br>from controls<br>(95% CI) | Median (range)<br>P value | Mean difference<br>from controls<br>(95% CI) |
| Control                    | 105 | 95 (55-100)               |                                              | 100 (60-100)              |                                              | 100 (35-100)              |                                              | 100 (35-100)              |                                              |
| Amblyopia                  | 103 | 80 (15-100)<br><0.001     | -13 (-17 to -8)                              | 90 (20-100)<br><0.001     | -11 (-15 to -7)                              | 90 (30-100)<br><0.001     | -9 (-13 to -5)                               | 80 (25-100)<br><0.001     | -15 (-19 to -10)                             |
| Cataract                   | 43  | 80 (30-100)<br><0.001     | -13 (-18 to -7)                              | 85 (5-100)<br><0.001      | -11 (-17 to -5)                              | 90 (35-100)<br><0.001     | -8 (-13 to -3)                               | 85 (10-100)<br><0.001     | -14 (-20 to -7)                              |
| Cornea                     | 6   | 70 (60-95)<br>0.002       | -20 (-29 to -11)                             | 78 (65-95)<br>0.001       | -16 (-27 to -5)                              | 90 (60-100)<br>0.052      | -7 (-17 to 2)                                | 85 (55-100)<br>0.007      | -11 (-23 to 0)                               |
| Eyelid                     | 10  | 70 (25-95)<br>0.004       | -19 (-35 to -2)                              | 83 (35-100)<br><0.001     | -22 (-39 to -5)                              | 95 (25-100)<br>0.04       | -9 (-18 to -1)                               | 93 (60-100)<br>0.004      | -8 (-17 to 1) <sup>b</sup>                   |
| Glaucoma                   | 10  | 60 (40-90)<br><0.001      | -25 (-37 to -12)                             | 78 (10-100)<br>0.002      | -22 (-41 to -3)                              | 82 (20-100)<br><0.001     | -23 (-41 to -5)                              | 83 (5-90)<br><0.001       | -25 (-46 to -4)                              |
| Nystagmus                  | 16  | 70 (30-95)<br><0.001      | -24 (-34 to -14)                             | 67 (20-100)<br><0.001     | -26 (-39 to -12)                             | 90 (50-100)<br>0.006      | -9 (-18 to -1)                               | 83 (15-100)<br><0.001     | -17 (-29 to -5)                              |
| Refractive error           | 54  | 85 (40-100)<br><0.001     | -10 (-14 to -5)                              | 90 (40-100)<br><0.001     | -9 (-14 to -5)                               | 90 (45-100)<br><0.001     | -7 (-11 to -3)                               | 90 (35-100)<br><0.001     | -8 (-13 to -3)                               |
| Retina                     | 22  | 67 (35-95)<br><0.001      | -25 (-34 to -16)                             | 72 (35-100)<br><0.001     | -21 (-31 to -12)                             | 87 (35-100)<br><0.001     | -12 (-21 to -4)                              | 80 (25-100)<br><0.001     | -15 (-24 to -6)                              |
| Strabismus                 | 119 | 80 (25-100)<br><0.001     | -12 (-16 to -8)                              | 85 (20-100)<br><0.001     | -13 (-17 to -9)                              | 85 (15-100)<br><0.001     | -11 (-15 to -7)                              | 85 (0-100)<br><0.001      | -15 (-19 to -10)                             |
| Uveitis                    | 6   | 85 (60-95)<br>0.06        | -10 (-19 to -1)                              | 87 (55-95)<br>0.008       | -10 (-18 to -2)                              | 85 (70-90)<br><0.001      | -11 (-21 to -2)                              | 83 (65-90)<br><0.001      | -13 (-24 to -2)                              |

<sup>a</sup>Fewer than 5 children with CVI, orbital, and pupil/iris conditions completed questionnaires, and therefore were not analyzed.

<sup>b</sup>Significant difference in distributions despite 95% confidence interval crossing zero, due to non-normal distribution of data
