# Supplementary material
Source: PubMed Central journal article supplement (PMC8169574)
Supplement: NIHMS1683076-supplement-4.pdf [file NIHMS1683076-supplement-4.pdf]

eSupplement 4. Proxy 5-11 year PedEyeQ domain scores across different eye conditions, showing comparison with visually normal controls

| Eye Condition <sup>a</sup> | N   | Functional Vision         |                                        | Bothered by Eyes/Vision   |                                        | Social                    |                                        | Frustration/Worry         |                                        | Eye care                  |                                        |
|----------------------------|-----|---------------------------|----------------------------------------|---------------------------|----------------------------------------|---------------------------|----------------------------------------|---------------------------|----------------------------------------|---------------------------|----------------------------------------|
|                            |     | Median (range)<br>P value | Mean difference from controls (95% CI) | Median (range)<br>P value | Mean difference from controls (95% CI) | Median (range)<br>P value | Mean difference from controls (95% CI) | Median (range)<br>P value | Mean difference from controls (95% CI) | Median (range)<br>P value | Mean difference from controls (95% CI) |
| Control                    | 105 | 100 (80-100)              |                                        | 100 (80-100)              |                                        | 100 (94-100)              |                                        | 100 (80-100)              |                                        | 100 (67-100)              |                                        |
| Amblyopia                  | 103 | 70 (5-100)<br><0.001      | -28<br>(-32 to -24)                    | 90 (0-100)<br><0.001      | -19<br>(-23 to -15)                    | 88 (13-100)<br><0.001     | -19<br>(-23 to -14)                    | 90 (0-100)<br><0.001      | -21<br>(-26 to -17)                    | 67 (0-100)<br><0.001      | -30<br>(-34 to -25)                    |
| Cataract                   | 44  | 85 (30-100)<br><0.001     | -19<br>(-24 to -13)                    | 95 (40-100)<br><0.001     | -13<br>(-19 to -8)                     | 91 (19-100)<br><0.001     | -18<br>(-25 to -11)                    | 100 (10-100)<br><0.001    | -14<br>(-21 to -7)                     | 83 (42-100)<br><0.001     | -18<br>(-23 to -12)                    |
| Cornea                     | 7   | 85 (50-100)<br><0.001     | -16<br>(-31 to -2)                     | 95 (75-100)<br><0.001     | -7<br>(-10 to -5)                      | 100 (75-100)<br><0.001    | -5<br>(-7 to -3)                       | 100 (80-100)<br><0.001    | -7<br>(-9 to -4)                       | 100 (67-100)<br><0.001    | -8<br>(-11 to -4)                      |
| CVI                        | 17  | 30 (5-100)<br><0.001      | -58<br>(-72 to -43)                    | 75 (10-100)<br><0.001     | -26<br>(-38 to -14)                    | 94 (50-100)<br><0.001     | -10<br>(-18 to -2)                     | 100 (50-100)<br><0.001    | -9<br>(-13 to -5)                      | 83 (25-100)<br><0.001     | -23<br>(-35 to -12)                    |
| Eyelid                     | 12  | 90 (45-100)<br><0.001     | -14<br>(-25 to -3)                     | 95 (50-100)<br><0.001     | -10<br>(-20 to -1)                     | 100 (50-100)<br><0.001    | -11<br>(-14 to -7)                     | 100 (30-100)<br>=0.008    | -7<br>(-11 to -3)                      | 96 (50-100)<br><0.001     | -10<br>(-14 to 7)                      |
| Glaucoma                   | 10  | 53 (35-95)<br><0.001      | -38<br>(-53 to -24)                    | 68 (35-95)<br><0.001      | -32<br>(-46 to -19)                    | 69 (25-94)<br><0.001      | -32<br>(-48 to -15)                    | 60 (30-100)<br><0.001     | -37<br>(-51 to -24)                    | 54 (50-100)<br><0.001     | -38<br>(-49 to -26)                    |
| Nystagmus                  | 21  | 50 (0-100)<br><0.001      | -51<br>(-64 to -37)                    | 65 (0-100)<br><0.001      | -37<br>(-53 to -21)                    | 88 (0-100)<br><0.001      | -25<br>(-38 to -12)                    | 90 (0-100)<br><0.001      | -21<br>(-35 to -8)                     | 75 (0-100)<br><0.001      | -26<br>(-39 to -13)                    |
| Orbital                    | 6   | 55 (10-85)<br><0.001      | -46<br>(-73 to -20)                    | 70 (55-95)<br><0.001      | -27<br>(-42 to -12)                    | 63 (50-88)<br><0.001      | -34<br>(-51 to -17)                    | 90 (60-100)<br><0.001     | -16<br>(-20 to -12)                    | 58 (42-75)<br><0.001      | -42<br>(-57 to -27)                    |
| Refractive error           | 55  | 90 (40-100)<br><0.001     | -16<br>(-20 to -11)                    | 95 (20-100)<br><0.001     | -11<br>(-15 to -6)                     | 94 (31-100)<br><0.001     | -11<br>(-16 to -7)                     | 100 (30-100)<br><0.001    | -11<br>(-16 to -5)                     | 92 (17-100)<br><0.001     | -14<br>(-19 to -9)                     |
| Retina                     | 26  | 50 (0-100)<br><0.001      | -51<br>(-65 to -37)                    | 70 (0-100)<br><0.001      | -37<br>(-50 to -24)                    | 81 (13-100)<br><0.001     | -24<br>(-35 to -14)                    | 75 (0-100)<br><0.001      | -33<br>(-46 to -20)                    | 63 (25-100)<br><0.001     | -31<br>(-40 to -21)                    |
| Strabismus                 | 131 | 80(15-100)<br><0.001      | -26<br>(-29 to -22)                    | 90 (5-100)<br><0.001      | -16<br>(-20 to -13)                    | 94 (0-100)<br><0.001      | -16<br>(-20 to -13)                    | 90 (10-100)<br><0.001     | -18<br>(-22 to -14)                    | 83 (8-100)<br><0.001      | -18<br>(-22 to -15)                    |
| Uveitis                    | 6   | 85 (40-100)<br><0.001     | -19<br>(-24 to -14)                    | 88 (60-100)<br><0.001     | -15<br>(-19 to -12)                    | 91 (38-100)<br><0.001     | -16<br>(-21 to -12)                    | 55 (30-90)<br><0.001      | -41<br>(-67 to -15)                    | 63 (33-92)<br><0.001      | -33<br>(-56 to -9)                     |

<sup>a</sup>Fewer than 5 children with pupil/iris conditions completed questionnaires, and therefore were not analyzed.
