# Supplementary material
Source: PubMed Central journal article supplement (PMC8169574)
Supplement: NIHMS1683076-supplement-5.pdf [file NIHMS1683076-supplement-5.pdf]

eSupplement 5. Parent PedEyeQ domain scores for parents of 5- to 11-year-olds with different eye conditions, showing comparison with parents of visually normal controls

| Eye condition <sup>a</sup> | N   | Impact on Parent and Family |                                              | Worry about Child's Eye Condition |                                              | Worry about Child's Self-perception and Interactions |                                              | Worry about Child's Functional Vision |                                              |
|----------------------------|-----|-----------------------------|----------------------------------------------|-----------------------------------|----------------------------------------------|------------------------------------------------------|----------------------------------------------|---------------------------------------|----------------------------------------------|
|                            |     | Median (range)<br>P value   | Mean difference<br>from controls (95%<br>CI) | Median (range)<br>P value         | Mean difference<br>from controls (95%<br>CI) | Median (range)<br>P value                            | Mean difference<br>from controls (95%<br>CI) | Median (range)<br>P value             | Mean difference<br>from controls (95%<br>CI) |
| Control                    | 105 | 100 (85-100)                |                                              | 100 (40-100)                      |                                              | 100 (64-100)                                         |                                              | 100 (50-100)                          |                                              |
| Amblyopia                  | 103 | 85 (35-100)<br><0.001       | -18 (-21 to -15)                             | 60 (0-100)<br><0.001              | -40 (-45 to -35)                             | 71 (7-100)<br><0.001                                 | -27 (-31 to -23)                             | 63 (0-100)<br><0.001                  | -36 (-41 to -30)                             |
| Cataract                   | 44  | 87 (45-100)<br><0.001       | -16 (-20 to -11)                             | 60 (10-100)<br><0.001             | -36 (-43 to -29)                             | 79 (21-100)<br><0.001                                | -25 (-32 to -17)                             | 69 (6-100)<br><0.001                  | -28 (-36 to -21)                             |
| Cornea                     | 7   | 90 (65-100)<br><0.001       | -12 (-15 to -9)                              | 70 (30-80)<br><0.001              | -35 (-54 to -15)                             | 86 (57-100)<br><0.001                                | -15 (-19 to -11)                             | 81 (50-87)<br><0.001                  | -22 (-37 to -8)                              |
| CVI                        | 17  | 65 (20-100)<br><0.001       | -35 (-48 to -22)                             | 55 (25-85)<br><0.001              | -39 (-48 to -31)                             | 71 (36-100)<br><0.001                                | -29 (-41 to -18)                             | 50 (25-100)<br><0.001                 | -45 (-56 to -34)                             |
| Eyelid                     | 12  | 93 (55-100)<br><0.001       | -12 (-22 to -2)                              | 80 (30-100)<br><0.001             | -26 (-41 to -11)                             | 71 (21-100)<br><0.001                                | -27 (-43 to -12)                             | 94 (25-100)<br><0.001                 | -16 (-31 to -1)                              |
| Glaucoma                   | 10  | 62 (20-95)<br><0.001        | -40 (-56 to -25)                             | 45 (0-65)<br><0.001               | -59 (-77 to -42)                             | 54 (7-93)<br><0.001                                  | -49 (-69 to -28)                             | 53 (6-88)<br><0.001                   | -50 (-70 to -31)                             |
| Nystagmus                  | 21  | 70 (5-100)<br><0.001        | -34 (-47 to -22)                             | 50 (0-90)<br><0.001               | -48 (-59 to -37)                             | 64 (7-100)<br><0.001                                 | -34 (-48 to -21)                             | 56 (0-100)<br><0.001                  | -50 (-64 to -35)                             |
| Orbital                    | 6   | 75 (50-95)<br><0.001        | -26 (-45 to -7)                              | 45 (15-70)<br><0.001              | -54 (-78 to -31)                             | 54 (7-79)<br><0.001                                  | -51 (-79 to -22)                             | 44 (12-94)<br><0.001                  | -51 (-85 to -18)                             |
| Refractive error           | 55  | 100 (55-100)<br><0.001      | -7 (-10 to -3)                               | 80 (35-100)<br><0.001             | -21 (-26 to -16)                             | 86 (7-100)<br><0.001                                 | -15 (-20 to -10)                             | 87 (12-100)<br><0.001                 | -19 (-25 to -13)                             |
| Retina                     | 26  | 78 (0-100)<br><0.001        | -28 (-39 to -17)                             | 42 (5-100)<br><0.001              | -55 (-66 to -45)                             | 64 (0-100)<br><0.001                                 | -38 (-50 to -25)                             | 44 (0-94)<br><0.001                   | -52 (-64 to -40)                             |
| Strabismus                 | 130 | 90 (30-100)<br><0.001       | -14 (-17 to -11)                             | 65 (5-100)<br><0.001              | -37 (-41 to -33)                             | 71 (0-100)<br><0.001                                 | -30 (-34 to -25)                             | 69 (6-100)<br><0.001                  | -32 (-37 to -27)                             |
| Uveitis                    | 6   | 75 (25-90)<br><0.001        | -37 (-67 to -7)                              | 38 (25-50)<br><0.001              | -59 (-70 to -47)                             | 86 (29-100)<br><0.001                                | -24 (-31 to -18)                             | 72 (13-100)<br><0.001                 | -36 (-44 to -28)                             |

<sup>a</sup>Fewer than 5 children with pupil/iris conditions completed questionnaires, and therefore were not analyzed.
