# Supplementary material
Source: PubMed Central journal article supplement (PMC8169574)
Supplement: NIHMS1683076-supplement-6.pdf [file NIHMS1683076-supplement-6.pdf]

eSupplement 6. Child 12–17 year PedEyeQ domain scores across different eye conditions, showing comparison with visually normal controls

| Eye Condition <sup>a</sup> | N  | Functional Vision         |                                           | Bothered by Eyes/Vision   |                                           | Social                    |                                           | Frustration/Worry         |                                           |
|----------------------------|----|---------------------------|-------------------------------------------|---------------------------|-------------------------------------------|---------------------------|-------------------------------------------|---------------------------|-------------------------------------------|
|                            |    | Median (range)<br>P value | Mean difference from controls<br>(95% CI) | Median (range)<br>P value | Mean difference from controls<br>(95% CI) | Median (range)<br>P value | Mean difference from controls<br>(95% CI) | Median (range)<br>P value | Mean difference from controls<br>(95% CI) |
| Control                    | 60 | 100 (80-100)              |                                           | 100 (80-100)              |                                           | 100 (95-100)              |                                           | 100 (78-100)              |                                           |
| Amblyopia                  | 31 | 90 (45-100)<br><0.001     | -15 (-21 to -9)                           | 95 (10-100)<br><0.001     | -19 (-28 to -9)                           | 100 (35-100)<br><0.001    | -8 (-14 to -2)                            | 78 (22-100)<br><0.001     | -23 (-30 to -15)                          |
| Cataract                   | 13 | 90 (35-100)<br><0.001     | -22 (-37 to -6)                           | 90 (30-100)<br><0.001     | -23 (-38 to -7)                           | 90 (5-100)<br><0.001      | -25 (-46 to -5)                           | 78 (44-100)<br><0.001     | -25 (-36 to -13)                          |
| Cornea                     | 6  | 85 (75-100)<br>0.001      | -12 (-16 to -8)                           | 83 (75-100)<br><0.001     | -15 (-20 to -11)                          | 93 (70-100)<br><0.001     | -12 (-14 to -9)                           | 78 (56-89)<br><0.001      | -22 (-37 to -7)                           |
| CVI                        | 10 | 63 (35-80)<br><0.001      | -38 (-49 to -27)                          | 73 (25-100)<br><0.001     | -33 (-49 to -16)                          | 85 (65-100)<br><0.001     | -15 (-24 to -6)                           | 67 (28-83)<br><0.001      | -36 (-49 to -23)                          |
| Eyelid                     | 6  | 97 (60-100)<br>0.047      | -11 (-15 to -6)                           | 100 (75-100)<br>= 0.043   | -9 (-13 to -5)                            | 100 (95-100)<br>= 0.047   | -1 (-2 to -1)                             | 86 (61-94)<br><0.001      | -18 (-30 to -5)                           |
| Glaucoma                   | 8  | 75 (60-95)<br><0.001      | -20 (-30 to -11)                          | 80 (45-100)<br><0.001     | -24 (-39 to -8)                           | 93 (85-95)<br><0.001      | -9 (-12 to -5)                            | 64 (33-100)<br><0.001     | -34 (-50 to -18)                          |
| Nystagmus                  | 13 | 60 (10-100)<br><0.001     | -40 (-56 to -25)                          | 60 (5-100)<br><0.001      | -45 (-61 to -28)                          | 75 (35-100)<br><0.001     | -30 (-44 to -16)                          | 61 (6-83)<br><0.001       | -41 (-53 to -28)                          |
| Orbital                    | 6  | 70 (55-90)<br><0.001      | -26 (-39 to -14)                          | 80 (35-90)<br><0.001      | -30 (-47 to -12)                          | 55 (40-95)<br><0.001      | -35 (-54 to -19)                          | 58 (50-83)<br><0.001      | -36 (-47 to -26)                          |
| Refractive error           | 48 | 90 (25-100)<br><0.001     | 14 (-18 to -9)                            | 90 (30-100)<br><0.001     | -14 (-19 to -9)                           | 100 (55-100)<br><0.001    | -5 (-8 to -2)                             | 78 (22-100)<br><0.001     | -19 (-24 to -14)                          |
| Retina                     | 25 | 70 (5-100)<br><0.001      | -30 (-39 to -21)                          | 80 (10-100)<br><0.001     | -30 (-41 to -19)                          | 95 (15-100)<br><0.001     | -18 (-28 to -8)                           | 61 (28-89)<br><0.001      | -34 (-41 to -27)                          |
| Strabismus                 | 60 | 80 (20-100)<br><0.001     | -20 (-25 to -15)                          | 85 (15-100)<br><0.001     | -22 (-27 to -16)                          | 90 (20-100)<br><0.001     | -18 (-23 to -12)                          | 72 (22-100)<br><0.001     | -27 (-32 to -22)                          |
| Uveitis                    | 16 | 77 (40-95)<br><0.001      | -23 (-31 to -16)                          | 85 (15-100)<br><0.001     | -26 (-40 to -12)                          | 88 (20-100)<br><0.001     | -21 (-34 to -7)                           | 58 (11-100)<br><0.001     | -43 (-58 to -28)                          |

<sup>a</sup>Fewer than 5 children with pupil/iris conditions completed questionnaires, and therefore were not analyzed
