# Supplementary material
Source: PubMed Central journal article supplement (PMC8169574)
Supplement: NIHMS1683076-supplement-7.pdf [file NIHMS1683076-supplement-7.pdf]

eSupplement 7. Proxy 12-17 year PedEyeQ domain scores across different eye conditions, showing comparison with visually normal controls

| Eye Condition <sup>a</sup> | N  | Functional Vision         |                                        | Bothered by Eyes/Vision   |                                        | Social                    |                                        | Frustration/Worry         |                                        | Eye care                  |                                        |
|----------------------------|----|---------------------------|----------------------------------------|---------------------------|----------------------------------------|---------------------------|----------------------------------------|---------------------------|----------------------------------------|---------------------------|----------------------------------------|
|                            |    | Median (range)<br>P value | Mean difference from controls (95% CI) | Median (range)<br>P value | Mean difference from controls (95% CI) | Median (range)<br>P value | Mean difference from controls (95% CI) | Median (range)<br>P value | Mean difference from controls (95% CI) | Median (range)<br>P value | Mean difference from controls (95% CI) |
| Control                    | 58 | 100 (95-100)              |                                        | 100 (95-100)              |                                        | 100 (100-100)             |                                        | 100 (81-100)              |                                        | 100 (100-100)             |                                        |
| Amblyopia                  | 31 | 85 (40-100)<br><0.001     | -21<br>(-27 to -15)                    | 90 (35-100)<br><0.001     | -17<br>(-24 to -11)                    | 100 (25-100)<br><0.001    | -10<br>(-17 to -3)                     | 81 (50-100)<br><0.001     | -20<br>(-26 to -13)                    | 92 (33-100)<br><0.001     | -11<br>(-17 to -5)                     |
| Cataract                   | 13 | 85 (20-100)<br><0.001     | -28<br>(-45 to -12)                    | 95 (25-100)<br><0.001     | -20<br>(-35 to -5)                     | 100 (25-100)<br><0.001    | -17<br>(-32 to -2)                     | 94 (19-100)<br><0.001     | -20<br>(-36 to -3)                     | 92 (58-100)<br><0.001     | -12<br>(-21 to -2)                     |
| Cornea                     | 7  | 75 (5-100)<br><0.001      | -31<br>(-60 to -2)                     | 75 (65-100)<br><0.001     | -16<br>(-31 to -2)                     | 94 (56-100)<br><0.001     | -16<br>(-21 to -11)                    | 75 (50-100)<br><0.001     | -22<br>(-41 to -3)                     | 92 (67-100)<br><0.001     | -12<br>(-23 to -1)                     |
| CVI                        | 12 | 55 (5-100)<br><0.001      | -46<br>(-66 to -26)                    | 63 (15-100)<br><0.001     | -37<br>(-54 to -20)                    | 100 (19-100)<br><0.001    | -18<br>(-26 to -10)                    | 75 (6-100)<br><0.001      | -33<br>(-55 to -11)                    | 92 (25-100)<br><0.001     | -19<br>(-34 to -5)                     |
| Eyelid                     | 7  | 95 (90-100)<br><0.001     | -3<br>(-5 to -2)                       | 100 (95-100)<br>0.01      | -1<br>(-2 to 0)                        | 100 (94-100)<br><0.001    | -2<br>(-3 to -1)                       | 100 (94-100)<br>0.01      | -1<br>(-3 to 1) <sup>b</sup>           | 100 (83-100)<br><0.001    | -4<br>(-5 to -2)                       |
| Glaucoma                   | 8  | 75 (55-100)<br><0.001     | -24<br>(-39 to -10)                    | 80 (50-100)<br><0.001     | -20<br>(-34 to -7)                     | 91 (75-100)<br><0.001     | -10<br>(-19 to -1)                     | 81 (56-100)<br><0.001     | -22<br>(-38 to -6)                     | 92 (33-100)<br><0.001     | -17<br>(-22 to -11)                    |
| Nystagmus                  | 13 | 55 (5-100)<br><0.001      | -50<br>(-69 to -31)                    | 60 (40-100)<br><0.001     | -34<br>(-48 to -21)                    | 50 (50-100)<br><0.001     | -30<br>(-44 to -16)                    | 56 (31-100)<br><0.001     | -32<br>(-48 to -16)                    | 83 (50-100)<br><0.001     | -19<br>(-31 to -7)                     |
| Orbital                    | 6  | 78 (10-90)<br><0.001      | -31<br>(-39 to -24)                    | 80 (50-95)<br><0.001      | -26<br>(-46 to -5)                     | 56 (31-94)<br><0.001      | -38<br>(-62 to -13)                    | 56 (50-81)<br><0.001      | -36<br>(-51 to -21)                    | 83 (50-100)<br><0.001     | -24<br>(-29 to -18)                    |
| Refractive error           | 47 | 95 (55-100)<br><0.001     | -8<br>(-11 to -5)                      | 100 (55-100)<br><0.001    | -7<br>(-10 to -4)                      | 100 (56-100)<br><0.001    | -4<br>(-6 to -1)                       | 100 (50-100)<br><0.001    | -7<br>(-11 to -3)                      | 100 (75-100)<br><0.001    | -4<br>(-6 to -2)                       |
| Retina                     | 28 | 60 (0-100)<br><0.001      | -43<br>(-55 to -30)                    | 73 (0-100)<br><0.001      | -33<br>(-44 to -21)                    | 94 (6-100)<br><0.001      | -21<br>(-32 to -10)                    | 75 (0-100)<br><0.001      | -33<br>(-45 to -22)                    | 83 (42-100)<br><0.001     | -20<br>(-27 to -13)                    |
| Strabismus                 | 61 | 80 (15-100)<br><0.001     | -23<br>(-28 to -18)                    | 90 (25-100)<br><0.001     | -17<br>(-22 to -13)                    | 88 (6-100)<br><0.001      | -18<br>(-23 to -12)                    | 81 (19-100)<br><0.001     | -21<br>(-26 to -15)                    | 92 (42-100)<br><0.001     | -12<br>(-16 to -8)                     |
| Uveitis                    | 16 | 68 (25-100)<br><0.001     | -30<br>(-42 to -19)                    | 75 (15-100)<br><0.001     | -31<br>(-43 to -18)                    | 97 (13-100)<br><0.001     | -20<br>(-34 to -5)                     | 56 (6-75)<br><0.001       | -46<br>(-57 to -35)                    | 83 (8-100)<br><0.001      | -29<br>(-43 to -15)                    |

<sup>a</sup>Fewer than 5 children with pupil/iris conditions completed questionnaires, and therefore were not analyzed.

<sup>b</sup>Significant difference in distributions despite 95% confidence intervals crossing zero, due to non-normal distribution of data.
