# Supplementary material
Source: PubMed Central journal article supplement (PMC8169574)
Supplement: NIHMS1683076-supplement-8.pdf [file NIHMS1683076-supplement-8.pdf]

eSupplement 8. Parent PedEyeQ domain scores for parents of 12- to 17-year-olds with different eye conditions, showing comparison with parents of visually normal controls

| Eye Condition <sup>a</sup> | Impact on Parent and Family |                           |                                           | Worry about Child's Eye Condition |                                           | Worry about Child's Self-Perception and Interactions |                                           | Worry about Child's Functional Vision |                                           |
|----------------------------|-----------------------------|---------------------------|-------------------------------------------|-----------------------------------|-------------------------------------------|------------------------------------------------------|-------------------------------------------|---------------------------------------|-------------------------------------------|
|                            | N                           | Median (range)<br>P value | Mean difference from controls<br>(95% CI) | Median (range)<br>P value         | Mean difference from controls<br>(95% CI) | Median (range)<br>P value                            | Mean difference from controls<br>(95% CI) | Median (range)<br>P value             | Mean difference from controls<br>(95% CI) |
| Control                    | 60                          | 100 (100-100)             |                                           | 100 (80-100)                      |                                           | 100 (100-100)                                        |                                           | 100 (100-100)                         |                                           |
| Amblyopia                  | 31                          | 95 (45-100)<br><0.001     | -9 (-14 to -4)                            | 65 (5-100)<br><0.001              | -37 (-46 to -29)                          | 100 (0-100)<br><0.001                                | -13 (-21 to -5)                           | 75 (12-100)<br><0.001                 | -28 (-36 to -20)                          |
| Cataract                   | 13                          | 95 (45-100)<br><0.001     | -13 (-24 to -2)                           | 75 (15-100)<br><0.001             | -30 (-45 to -14)                          | 93 (50-100)<br><0.001                                | -16 (-28 to -4)                           | 81 (13-100)<br><0.001                 | -25 (-41 to -10)                          |
| Cornea                     | 7                           | 100 (50-100)<br><0.001    | -18 (-23 to -12)                          | 70 (20-100)<br><0.001             | -38 (-63 to -13)                          | 100 (43-100)<br><0.001                               | -20 (-27 to -14)                          | 81 (13-100)<br><0.001                 | -29 (-37 to -21)                          |
| CVI                        | 12                          | 70 (15-100)<br><0.001     | -30 (-48 to -13)                          | 57 (20-100)<br><0.001             | -38 (-56 to -21)                          | 79 (21-100)<br><0.001                                | -33 (-51 to -15)                          | 50 (6-100)<br><0.001                  | -47 (-69 to -25)                          |
| Eyelid                     | 7                           | 100 (95-100)<br>0.004     | -1 (-1 to 0)                              | 95 (65-100)<br><0.001             | -12 (-17 to -8)                           | 100 (93-100)<br>0.004                                | -1 (-2 to 0)                              | 100 (50-100)<br>0.004                 | -7 (-12 to -3)                            |
| Glaucoma                   | 8                           | 85 (55-100)<br><0.001     | -18 (-31 to -4)                           | 50 (30-90)<br><0.001              | -42 (-60 to -24)                          | 93 (79-100)<br><0.001                                | -11 (-17 to -4)                           | 75 (56-88)<br><0.001                  | -24 (-32 to -17)                          |
| Nystagmus                  | 13                          | 70 (35-100)<br><0.001     | -26 (-39 to -13)                          | 40 (10-100)<br><0.001             | -54 (-72 to -36)                          | 57 (21-100)<br><0.001                                | -42 (-56 to -28)                          | 44 (0-100)<br><0.001                  | -56 (-76 to -36)                          |
| Orbital                    | 6                           | 83 (55-100)<br><0.001     | -19 (-35 to -3)                           | 65 (30-80)<br><0.001              | -39 (-59 to -20)                          | 54 (50-93)<br><0.001                                 | -40 (-58 to -23)                          | 75 (13-94)<br><0.001                  | -36 (-66 to -6)                           |
| Refractive error           | 47                          | 100 (70-100)<br><0.001    | -3 (-4 to -1)                             | 90 (50-100)<br><0.001             | -12 (-16 to -8)                           | 100 (64-100)<br><0.001                               | -4 (-7 to -2)                             | 94 (50-100)<br><0.001                 | -9 (-12 to -6)                            |
| Retina                     | 28                          | 82 (10-100)<br><0.001     | -27 (-37 to -16)                          | 40 (0-100)<br><0.001              | -52 (-63 to -41)                          | 79 (0-100)<br><0.001                                 | -31 (-44 to -18)                          | 59 (12-100)<br><0.001                 | -42 (-54 to -30)                          |
| Strabismus                 | 62                          | 95 (35-100)<br><0.001     | -12 (-16 to -9)                           | 67 (5-100)<br><0.001              | -38 (-45 to -31)                          | 82 (7-100)<br><0.001                                 | -23 (-29 to -17)                          | 75 (6-100)<br><0.001                  | -28 (-34 to -22)                          |
| Uveitis                    | 16                          | 70 (40-100)<br><0.001     | -31 (-40 to -21)                          | 45 (15-85)<br><0.001              | -52 (-62 to -42)                          | 86 (21-100)<br><0.001                                | -20 (-32 to -8)                           | 72 (0-100)<br><0.001                  | -35 (-51 to -19)                          |

<sup>a</sup>Fewer than 5 children with pupil/iris conditions completed questionnaires, and therefore were not analyzed.
